# Supplementary material for: Field-Scale Testing of a High-Efficiency Membrane Reactor (MR)—Adsorptive Reactor (AR) Process for H2 Generation and Pre-Combustion CO2 Capture
Source: MDPI journal article supplement (doi:10.3390/membranes14020051), 2024-02-11
Supplement: s1 [file s1]

## Supplementary Materials

### MR and Main Oven

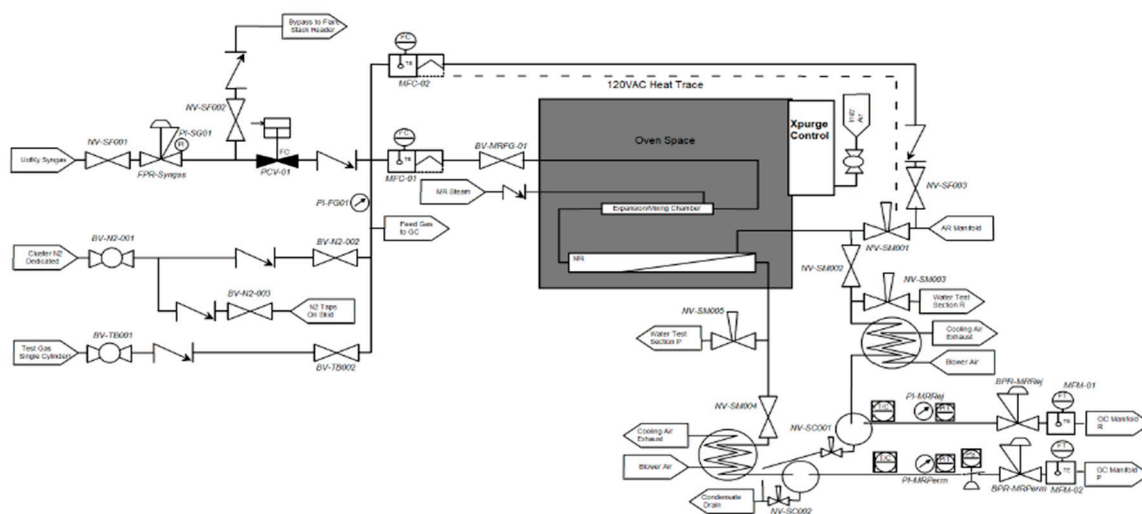

Figure S1: P&ID of the MR and the main oven.

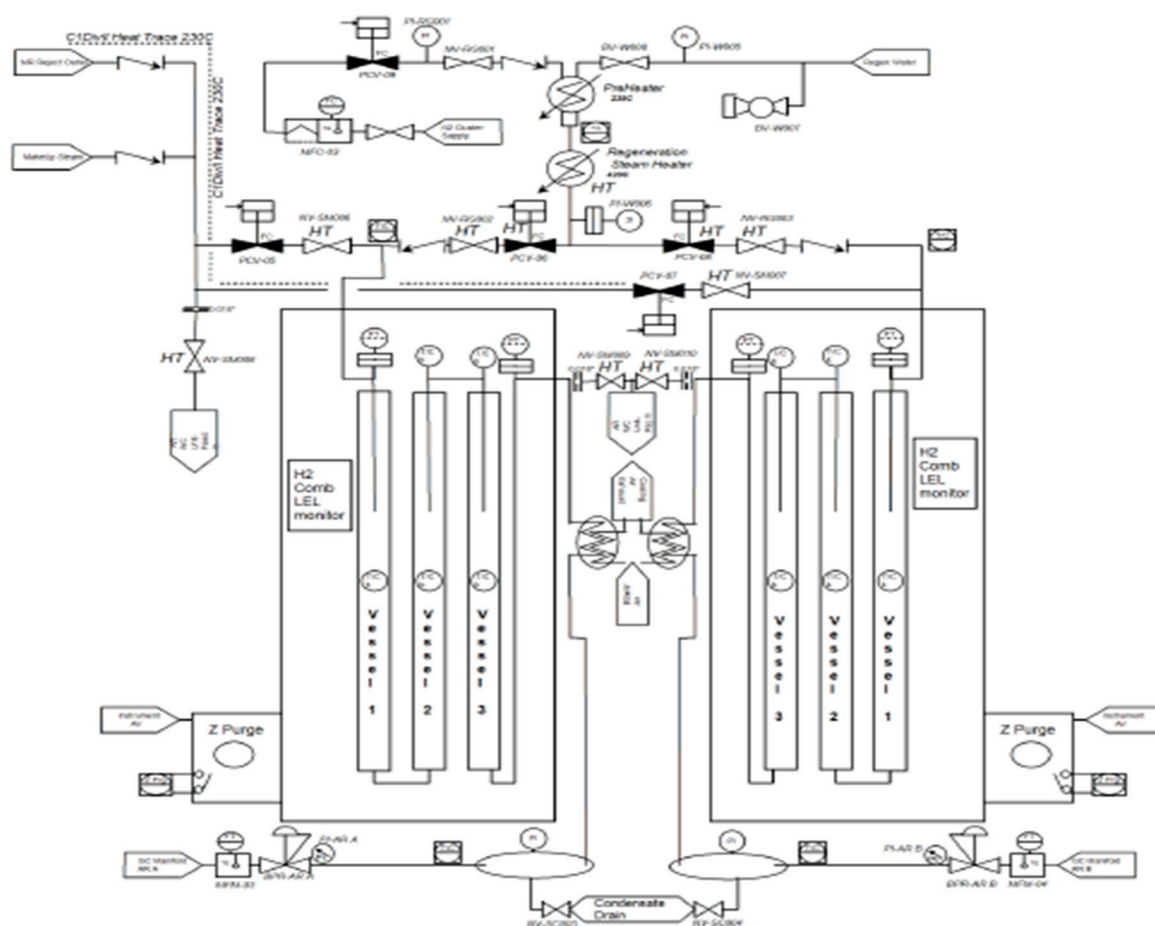

Figure S2: P&ID of the AR component.

**Table S1:** AR design parameters and operating conditions (adsorption/regeneration),

|                                                           |                      |
|-----------------------------------------------------------|----------------------|
| Length [']                                                | 5                    |
| Diameter ["]                                              | 2.5                  |
| Heat Transfer Coefficient of Vessel [W/m <sup>2</sup> *K] | 227                  |
| AR Vessel Wall Temperature [K]                            | 523 (Ads.)/673 (Reg) |
| P [bar]                                                   | 25                   |
| Feed T [K]                                                | 523 (Ads.)/673 (Reg) |
| Density of Catalyst [kg/m <sup>3</sup> ]                  | 592.68               |
| Density of Adsorbent [kg/m <sup>3</sup> ]                 | 1,780                |
| Catalyst Pellet Void Fraction [-]                         | 0.35561              |
| Adsorbent Pellet Void Fraction [-]                        | 0.5                  |
| Mean Pore Diameter of Catalyst [m]                        | 6.3*10 <sup>-9</sup> |
| Mean Pore Diameter of Adsorbent [m]                       | 6.3*10 <sup>-7</sup> |
| Catalyst/Adsorbent Bed Void Fraction [-]                  | 0.4717               |
| <b>Feed (Regeneration Cycle)</b>                          |                      |
| 100% steam                                                |                      |
| Flow Rate [scfm]                                          | 2.5 - 10             |
| <b>Feed (Adsorption Cycle)</b>                            |                      |
| <b>Composition (Molar Ratios)</b>                         |                      |
| CO <sub>2</sub> /CO                                       | 1.2                  |
| H <sub>2</sub> /CO                                        | 1.05                 |
| H <sub>2</sub> O/CO                                       | 2                    |
| Flow rate [scfm]                                          | 2.5                  |
| <b>AR Fixed-Bed Composition</b>                           |                      |
| W <sub>ads</sub> [kg]                                     | 2.72                 |
| W <sub>cat</sub> [kg]                                     | 1.75                 |
| W <sub>ads</sub> /W <sub>cat</sub>                        | 1.55                 |
| Pellet Diameter ["]                                       | 0.25                 |

**Table S2:** AR adsorption test-run parameters.

|                                                    | Value    | Unit |
|----------------------------------------------------|----------|------|
| <b>AR Test Feed</b>                                |          |      |
| Pressure (Avg.)                                    | 16.35    | bar  |
| Temperature (Avg.)                                 | 517      | K    |
| Feed Mole Fraction: CO <sub>2</sub> N <sub>2</sub> | 0.3, 0.7 | -    |

|                                                   |       |                   |
|---------------------------------------------------|-------|-------------------|
| Flow Rate (Avg.)                                  | 0.326 | scfm              |
|                                                   |       |                   |
| <b>AR Configuration</b>                           |       |                   |
| AR Vessel Length (3 AR in Series, Each 5 ft long) | 15    | ft                |
| AR Vessel Diameter                                | 2.5   | in                |
| Packing Density (Catalyst)                        | 568   | kg/m <sup>3</sup> |
| Packing Density (Adsorbent)                       | 1700  | kg/m <sup>3</sup> |
| Adsorbent Pellet Pore Diameter                    | 23.07 | nm                |
| Max. Adsorbent Loading/Train (3 AR in Series)     | 1639  | g                 |
| Wads/Wcat                                         | 8     | -                 |

**Table S3:** MR-AR IGCC plant performance summary.

| Performance Summary                          |                 |                |
|----------------------------------------------|-----------------|----------------|
|                                              | Case B5B        | MR-AR          |
| Combustion Turbine Power, MWe                | 464             | 464            |
| Sweet Gas Expander, MWe                      | 3               | 3              |
| Steam Turbine Power, MWe                     | 274             | 274            |
| <b>Total Gross Power, MWe</b>                | <b>741</b>      | <b>741</b>     |
| Air Separation Unit Main Air Compressor, kWe | 71,280          | 71,280         |
| Air Separation Unit Booster Compressor, kWe  | 5,610           | 5,610          |
| Nitrogen Compressors, kWe                    | 36,580          | 36,580         |
| CO <sub>2</sub> Compression, kWe             | 31,670          | 9,327          |
| Acid Gas Removal, kWe                        | 11,550          | 2,950          |
| Balance of Plant, kWe                        | 28,080          | 28,977         |
| <b>Total Auxiliaries, MWe</b>                | <b>185</b>      | <b>155</b>     |
| <b>Net Power, MWe</b>                        | <b>556</b>      | <b>586</b>     |
| HHV Net Plant Efficiency (%)                 | 33.7%           | 35.5%          |
| HHV Net Plant Heat Rate, kJ/kWh (Btu/kWh)    | 10,675 (10,118) | 10,131 (9,603) |
| HHV Cold Gas Efficiency, %                   | 79.0%           | 79.0%          |
| HHV Combustion Turbine Efficiency, %         | 36.4%           | 36.4%          |
| LHV Net Plant Efficiency (%)                 | 35.0%           | 36.8%          |
| LHV Net Plant Heat Rate, kJ/kWh (Btu/kWh)    | 10,296 (9,759)  | 9,772 (9,262)  |
| LHV Cold Gas Efficiency, %                   | 75.7%           | 75.7%          |
| LHV Combustion Turbine Efficiency, %         | 42.8%           | 42.8%          |
| Steam Turbine Cycle Efficiency, %            | 43.1%           | 43.1%          |
| Steam Turbine Heat Rate, kJ/kWh (Btu/kWh)    | 8,356 (7,920)   | 8,356 (7,920)  |

|                                                                            |                   |                   |
|----------------------------------------------------------------------------|-------------------|-------------------|
| Condenser Duty, GJ/hr (MMBtu/hr)                                           | 1,555 (1,474)     | 1,555 (1,474)     |
| AGR Cooling Duty, GJ/hr (MMBtu/hr)                                         | 147 (140)         | 147 (140)         |
| As-Received Coal Feed, kg/hr (lb/hr)                                       | 218,895 (482,580) | 218,895 (482,580) |
| HHV Thermal Input, kWt                                                     | 1,649,926         | 1,649,926         |
| LHV Thermal Input, kWt                                                     | 1,591,374         | 1,591,374         |
| Raw Water Withdrawal, (m³/min)/MW <sub>net</sub> (gpm/MW <sub>net</sub> )  | 0.037 (9.9)       | 0.034 (9.0)       |
| Raw Water Consumption, (m³/min)/MW <sub>net</sub> (gpm/MW <sub>net</sub> ) | 0.030 (7.9)       | 0.026 (6.9)       |
| O <sub>2</sub> :As-Received Coal                                           | 0.760             | 0.760             |

**Table S4:** MR-AR plant LCOE breakdown.

|                                   | MR-AR         |            | Baseline      |            |
|-----------------------------------|---------------|------------|---------------|------------|
| <b>Net Power Production (MWe)</b> | <b>586</b>    |            | <b>556</b>    |            |
| Component                         | Value, \$/MWh | Percentage | Value, \$/MWh | Percentage |
| Capital                           | 64.1          | 46%        | 75.2          | 49%        |
| Fixed                             | 25.8          | 19%        | 27.2          | 18%        |
| Variable                          | 19.4          | 14%        | 19.3          | 13%        |
| Fuel                              | 21.4          | 15%        | 22.5          | 15%        |
| <b>Total (Excluding T&amp;S)</b>  | <b>130.7</b>  | <b>N/A</b> | <b>144.2</b>  | <b>N/A</b> |
| CO <sub>2</sub> T&S               | 8.2           | 6%         | 8.1           | 5%         |
| <b>Total (Including T&amp;S)</b>  | <b>138.9</b>  | <b>N/A</b> | <b>152.3</b>  | <b>N/A</b> |

**Table S5:** MR-AR plant LCOE breakdown with N<sub>2</sub> sale @ \$30/ton, with/without N<sub>2</sub> compression.

|                                                                   | MR-AR         |            | Baseline      |            |
|-------------------------------------------------------------------|---------------|------------|---------------|------------|
| With N <sub>2</sub> Compression                                   |               |            |               |            |
| Net Power Production (MWe)                                        | 586           |            | 556           |            |
| Component                                                         | Value, \$/MWh | Percentage | Value, \$/MWh | Percentage |
| Capital                                                           | 64.1          | 59%        | 75.2          | 49%        |
| Fixed                                                             | 25.8          | 24%        | 27.2          | 18%        |
| Variable                                                          | 19.4          | 18%        | 19.3          | 13%        |
| Fuel                                                              | 21.4          | 20%        | 22.5          | 15%        |
| N <sub>2</sub> sales @ \$30/ton (with N <sub>2</sub> Compression) | -29.5         | -27%       | N/A           | N/A        |
| Total (Excluding T&S) [with N <sub>2</sub> Compression]           | 101.2         | N/A        | 144.2         | N/A        |

|                                                                   |              |            |              |            |
|-------------------------------------------------------------------|--------------|------------|--------------|------------|
| CO <sub>2</sub> T&S                                               | 8.2          | 8%         | 8.1          | 5%         |
| <b>Total (Including T&amp;S) [with N<sub>2</sub> Compression]</b> | <b>109.5</b> | <b>N/A</b> | <b>152.3</b> | <b>N/A</b> |
| <b>Without N<sub>2</sub> compression</b>                          |              |            |              |            |
| <b>Net Power Production (MWe)</b>                                 | <b>623</b>   |            | <b>N/A</b>   |            |
| Capital                                                           | 60.4         | 59%        | N/A          | N/A        |
| Fixed                                                             | 24.3         | 24%        | N/A          | N/A        |
| Variable                                                          | 18.3         | 18%        | N/A          | N/A        |
| Fuel                                                              | 20.1         | 20%        | N/A          | N/A        |
| N <sub>2</sub> sales @ \$30/ton (no N <sub>2</sub> Compression)   | -27.8        | -27%       | N/A          | N/A        |
| <b>Total (Excluding T&amp;S) [no N<sub>2</sub> Compression]</b>   | <b>95.3</b>  | <b>N/A</b> | <b>N/A</b>   | <b>N/A</b> |
| CO <sub>2</sub> T&S                                               | 7.7          | 8%         | N/A          | N/A        |
| <b>Total (Including T&amp;S) [no N<sub>2</sub> Compression]</b>   | <b>103.0</b> | <b>N/A</b> | <b>N/A</b>   | <b>N/A</b> |

**Table S6:** MR-AR plant LCOE breakdown with Ar sales @ \$4.0/kg, with/without N<sub>2</sub> compression, and a 20% and 7% increase in ASU capital cost and fixed operating cost, respectively.

|                                                         | MR-AR         |            | Baseline      |            |
|---------------------------------------------------------|---------------|------------|---------------|------------|
| With N <sub>2</sub> Compression                         |               |            |               |            |
| Net Power Production (MWe)                              | 586           |            | 556           |            |
| Component                                               | Value, \$/MWh | Percentage | Value, \$/MWh | Percentage |
| Capital                                                 | 64.5          | 89%        | 75.2          | 49%        |
| Fixed                                                   | 27.6          | 38%        | 27.2          | 18%        |
| Variable                                                | 19.4          | 27%        | 19.3          | 13%        |
| Fuel                                                    | 21.4          | 29%        | 22.5          | 15%        |
| Ar sales @ \$4.0/kg (with N <sub>2</sub> Compression)   | -68.3         | -94%       | N/A           | N/A        |
| Total (Excluding T&S) [with N <sub>2</sub> Compression] | 64.6          | N/A        | 144.2         | N/A        |
| CO <sub>2</sub> T&S                                     | 8.2           | 11%        | 8.1           | 5%         |
| Total (Including T&S) [with N <sub>2</sub> Compression] | 72.9          | N/A        | 152.3         | N/A        |
| Without N <sub>2</sub> Compression                      |               |            |               |            |
| Net Power Production (MWe)                              | 623           |            | N/A           |            |
| Capital                                                 | 60.7          | 89%        | N/A           | N/A        |
| Fixed                                                   | 26.0          | 38%        | N/A           | N/A        |
| Variable                                                | 18.3          | 27%        | N/A           | N/A        |

|                                                                 |             |            |            |            |
|-----------------------------------------------------------------|-------------|------------|------------|------------|
| Fuel                                                            | 20.1        | 29%        | N/A        | N/A        |
| Ar sales @ \$4.0/kg (no N <sub>2</sub> Compression)             | -64.2       | -94%       | N/A        | N/A        |
| <b>Total (Excluding T&amp;S) [no N<sub>2</sub> Compression]</b> | <b>60.8</b> | <b>N/A</b> | <b>N/A</b> | <b>N/A</b> |
| CO <sub>2</sub> T&S                                             | 7.7         | 11%        | N/A        | N/A        |
| <b>Total (Including T&amp;S) [no N<sub>2</sub> Compression]</b> | <b>68.6</b> | <b>N/A</b> | <b>N/A</b> | <b>N/A</b> |
